# Supplementary material
Source: Elsevier journal article supplement (https://www.sciencedirect.com/science/article/pii/S0213911115002071)
Supplement: mmc1 [file S0213911115002071:mmc1.docx]

|  |  | Andalucía | Aragón | Asturias | Islas Baleares | Canarias | Cantabria | Castilla y León | Castilla-La Mancha | Cataluña | Comunidad Valenciana | Extrema-dura | Galicia | Madrid | Murcia | Navarra | País Vasco | La Rioja |
| --- | --- | --- | --- | --- | --- | --- | --- | --- | --- | --- | --- | --- | --- | --- | --- | --- | --- | --- |
| Porcentaje gasto sanitario en contratación de centros privados | 2008 | 4,28 | 4,20 | 7,00 | 4,64 | 9,41 | 2,31 | 4,44 | 6,05 | 29,55 | 6,31 | 3,72 | 5,79 | 6,19 | 7,93 | 5,84 | 7,25 | 5,99 |
| 2009 | 4,71 | 3,89 | 6,68 | 4,59 | 9,51 | 3,73 | 3,95 | 6,62 | 25,29 | 5,83 | 3,94 | 5,66 | 7,55 | 7,06 | 6,45 | 7,12 | 6,99 |
| 2010 | 5,13 | 3,76 | 7,68 | 5,09 | 9,97 | 3,94 | 4,33 | 6,31 | 23,94 | 6,30 | 3,85 | 5,66 | 7,75 | 7,20 | 6,60 | 6,96 | 7,26 |
| 2011 | 4,72 | 3,99 | 7,19 | 8,09 | 10,34 | 4,50 | 5,06 | 6,75 | 24,06 | 6,58 | 4,27 | 5,82 | 8,46 | 7,17 | 7,58 | 6,96 | 7,45 |
| 2012 | 4,99 | 4,18 | 7,16 | 9,01 | 9,94 | 2,99 | 4,69 | 6,38 | 25,01 | 6,15 | 4,77 | 5,83 | 10,82 | 7,20 | 7,30 | 7,19 | 8,07 |
| 2013 | 4,37 | 3,37 | 6,22 | 9,63 | 10,51 | 3,84 | 4,35 | 5,30 | 25,59 | 6,15 | 4,62 | 5,75 | 10,60 | 6,51 | 7,20 | 7,05 | 8,77 |
|  |  |  |  |  |  |  |  |  |  |  |  |  |  |  |  |  |  |  |
| Proporción camas hospitalarias públicas/pri-vadas | 2008 | 3,09 | 3,97 | 3,34 | 2,19 | 1,74 | 2,10 | 3,27 | 10,64 | 0,57 | 4,65 | 9,44 | 3,33 | 1,97 | 1,77 | 1,41 | 2,27 | 6,64 |
| 2009 | 3,06 | 3,88 | 3,21 | 2,31 | 1,75 | 2,05 | 3,39 | 10,91 | 0,57 | 4,97 | 10,08 | 3,41 | 1,95 | 1,78 | 1,35 | 2,29 | 6,23 |
| 2010 | 3,13 | 4,72 | 3,21 | 2,38 | 1,71 | 2,18 | 3,31 | 13,63 | 0,79 | 5,99 | 8,89 | 3,42 | 2,07 | 1,77 | 1,34 | 2,37 | 5,27 |
| 2011 | 3,02 | 4,73 | 3,16 | 2,48 | 1,83 | 2,12 | 3,09 | 13,75 | 0,79 | 5,57 | 8,91 | 3,26 | 2,06 | 1,85 | 1,48 | 2,43 | 5,25 |
| 2012 | 3,05 | 4,65 | 3,19 | 2,45 | 1,83 | 2,13 | 3,06 | 12,21 | 0,87 | 5,89 | 9,22 | 3,34 | 2,04 | 1,83 | 1,46 | 2,43 | 5,17 |
| 2013 | 3,10 | 4,63 | 3,13 | 2,09 | 1,86 | 2,06 | 2,98 | 12,28 | 0,84 | 5,49 | 7,28 | 3,41 | 1,99 | 1,74 | 1,46 | 2,49 | 3,30 |
|  |  |  |  |  |  |  |  |  |  |  |  |  |  |  |  |  |  |  |
| Gasto sanitario público. Total consolidado (sin corporaciones locales) | 2008 | 10.307.068 | 1.897.573 | 1.550.407 | 1.312.111 | 2.854.531 | 773.223 | 3.621.070 | 2.870.904 | 9.872.154 | 6.136.590 | 1.659.212 | 3.805.445 | 7.444.430 | 2.132.190 | 916.413 | 3.341.272 | 470.302 |
| 2009 | 10.275.784 | 2.051.556 | 1.748.185 | 1.426.017 | 2.993.846 | 812.242 | 3.540.557 | 3.167.422 | 10.527.040 | 6.649.981 | 1.749.328 | 4.064.440 | 8.042.266 | 2.258.270 | 1.005.880 | 3.606.720 | 467.888 |
| 2010 | 10.008.978 | 1.991.048 | 1.672.215 | 1.678.928 | 2.852.465 | 858.446 | 3.616.111 | 3.203.811 | 10.688.086 | 6.805.430 | 1.730.317 | 3.937.966 | 7.362.693 | 2.240.581 | 998.242 | 3.605.635 | 466.667 |
| 2011 | 9.442.263 | 2.050.725 | 1.720.684 | 1.583.788 | 2.731.177 | 767.087 | 3.331.929 | 3.067.039 | 10.120.602 | 6.717.214 | 1.692.857 | 3.668.224 | 8.418.057 | 2.265.509 | 987.510 | 3.566.168 | 461.903 |
| 2012 | 9.222.669 | 2.043.354 | 1.655.199 | 1.293.164 | 2.519.267 | 1.046.218 | 3.455.191 | 2.612.747 | 9.482.956 | 6.115.573 | 1.555.519 | 3.530.254 | 7.665.513 | 2.110.545 | 918.491 | 3.448.823 | 418.980 |
| 2013 | 8.811.921 | 1.655.999 | 1.520.277 | 1.278.217 | 2.552.820 | 801.168 | 3.391.466 | 2.505.812 | 9.265.086 | 5.670.917 | 1.542.614 | 3.558.716 | 7.402.709 | 2.086.493 | 892.198 | 3.394.440 | 414.895 |
|  |  |  |  |  |  |  |  |  |  |  |  |  |  |  |  |  |  |  |
| Tasa de personal en atención primaria por 1000 habitantes | 2008 | 1,98 | 1,84 | 1,77 | 1,42 | 1,51 | 1,76 | 2,32 | 1,86 | 1,79 | 1,69 | 2,06 | 1,82 | 1,65 | 1,67 | 1,86 | 1,76 | 1,78 |
| 2009 | 1,85 | 1,86 | 1,94 | 1,41 | 1,55 | 1,73 | 2,37 | 1,85 | 1,90 | 1,75 | 2,08 | 1,84 | 1,62 | 1,71 | 1,88 | 2,03 | 1,76 |
| 2010 | 1,88 | 1,89 | 1,88 | 1,45 | 1,55 | 1,75 | 2,22 | 1,84 | 1,83 | 1,76 | 2,09 | 1,85 | 1,55 | 1,69 | 1,88 | 2,06 | 2,09 |
| 2011 | 1,89 | 1,88 | 1,81 | 1,47 | 1,58 | 1,76 | 2,23 | 1,85 | 1,91 | 1,77 | 2,09 | 1,84 | 1,55 | 1,70 | 1,88 | 2,06 | 1,88 |
| 2012 | 1,89 | 1,84 | 1,77 | 1,48 | 1,59 | 1,72 | 2,22 | 1,88 | 1,91 | 1,72 | 2,17 | 1,84 | 1,54 | 1,70 | 1,88 | 1,99 | 1,79 |
| 2013 | 1,88 | 1,83 | 1,71 | 1,57 | 1,60 | 1,72 | 2,23 | 1,83 | 1,87 | 1,74 | 2,12 | 1,83 | 1,53 | 1,68 | 1,88 | 1,93 | 1,80 |
|  |  |  |  |  |  |  |  |  |  |  |  |  |  |  |  |  |  |  |
| Tasa de personal en atención especializada por 1000 habitantes | 2008 | 8,69 | 12,82 | 11,32 | 10,43 | 9,87 | 11,33 | 9,97 | 10,49 | 5,79 | 7,90 | 10,93 | 10,00 | 10,05 | 9,55 | 9,59 | 7,94 | 11,44 |
| 2009 | 8,69 | 13,05 | 11,50 | 10,15 | 9,68 | 11,13 | 10,40 | 10,96 | 5,93 | 8,16 | 10,79 | 10,08 | 10,13 | 9,58 | 10,62 | 8,51 | 10,64 |
| 2010 | 9,30 | 13,05 | 11,32 | 10,30 | 10,08 | 11,00 | 10,70 | 11,10 | 6,50 | 8,42 | 10,77 | 9,90 | 10,05 | 9,79 | 11,59 | 11,86 | 10,07 |
| 2011 | 9,03 | 13,51 | 11,71 | 10,00 | 9,84 | 11,04 | 10,40 | 10,82 | 6,43 | 8,10 | 10,22 | 9,18 | 10,32 | 9,92 | 9,88 | 11,68 | 10,30 |
| 2012 | 8,64 | 13,30 | 11,24 | 9,94 | 9,40 | 10,79 | 10,42 | 10,04 | 6,75 | 8,03 | 10,51 | 9,39 | 10,01 | 9,55 | 8,95 | 11,52 | 10,09 |
| 2013 | 8,48 | 12,73 | 10,99 | 9,60 | 9,60 | 10,52 | 9,99 | 9,81 | 6,51 | 8,07 | 10,42 | 9,63 | 9,46 | 9,45 | 8,98 | 12,49 | 9,84 |

**Apéndice Tabla I** Evolución de los indicadores de privatización sanitaria, financiación y recursos sanitarios por comunidades autónomas, 2008-2013
